# Supplementary material for: Concentration–QT Modeling Following Inhalation of the Novel Inhaled Phosphodiesterase‐4 Inhibitor CHF6001 in Healthy Volunteers Shows an Absence of QT Prolongation
Source: PubMed Central journal article supplement — CPT Pharmacometrics Syst Pharmacol. 2019 May 11;8(7):460–8. doi: 10.1002/psp4.12405 (PMC6656937; doi:10.1002/psp4.12405), 2019-05-11
Supplement: PSP4-8-460-s001.pdf [file PSP4-8-460-s001.pdf]

Goodness of fit and residual diagnostic plots  
for the LME model

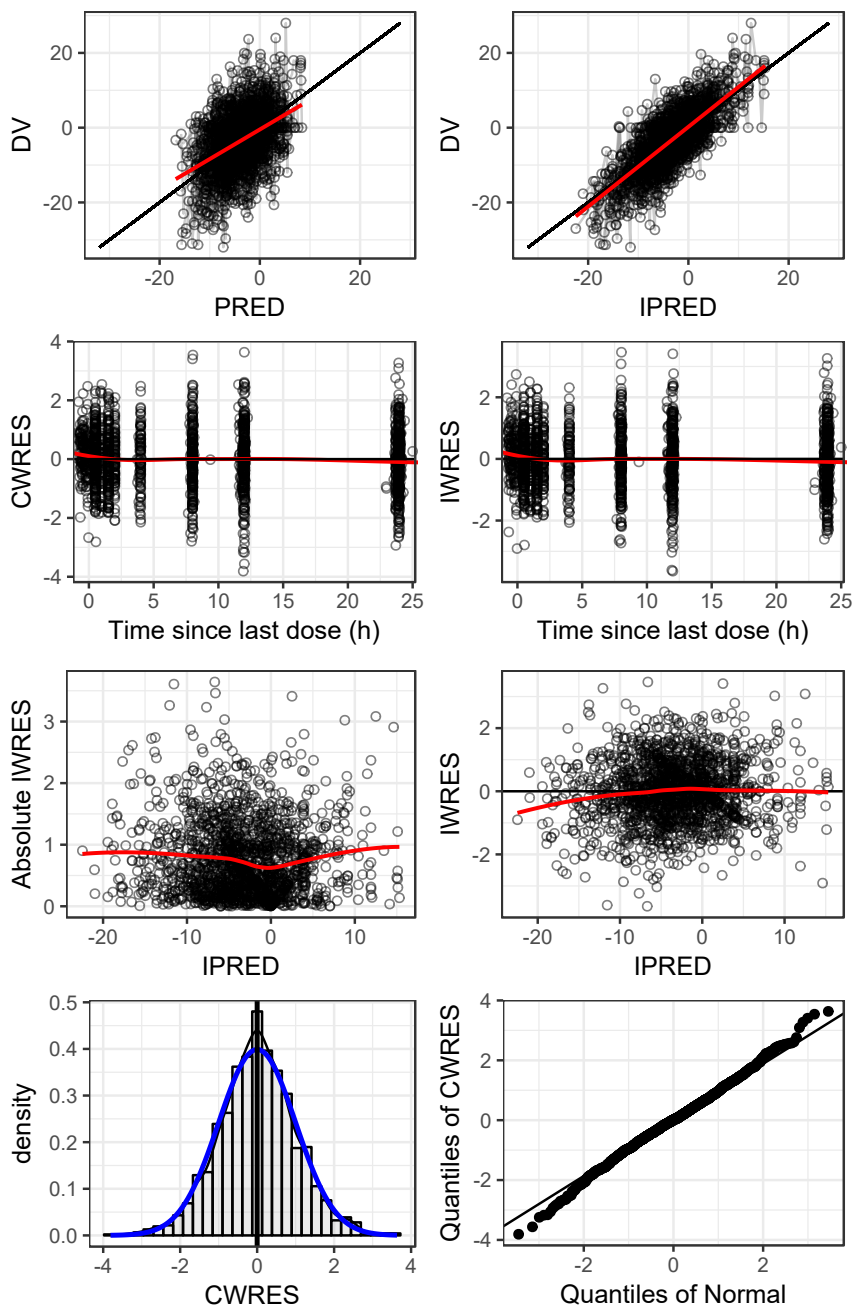

Figure S1: DV is  $\Delta$ QTcF, PRED: population predictions, IPRED: Individual predictions, CWRES: Conditional weighted residuals, IWRES: Individual weighted residuals
