# Supplementary material for: Concentration–QT Modeling Following Inhalation of the Novel Inhaled Phosphodiesterase‐4 Inhibitor CHF6001 in Healthy Volunteers Shows an Absence of QT Prolongation
Source: PubMed Central journal article supplement — CPT Pharmacometrics Syst Pharmacol. 2019 May 11;8(7):460–8. doi: 10.1002/psp4.12405 (PMC6656937; doi:10.1002/psp4.12405), 2019-05-11
Supplement: PSP4-8-460-s002.pdf [file PSP4-8-460-s002.pdf]

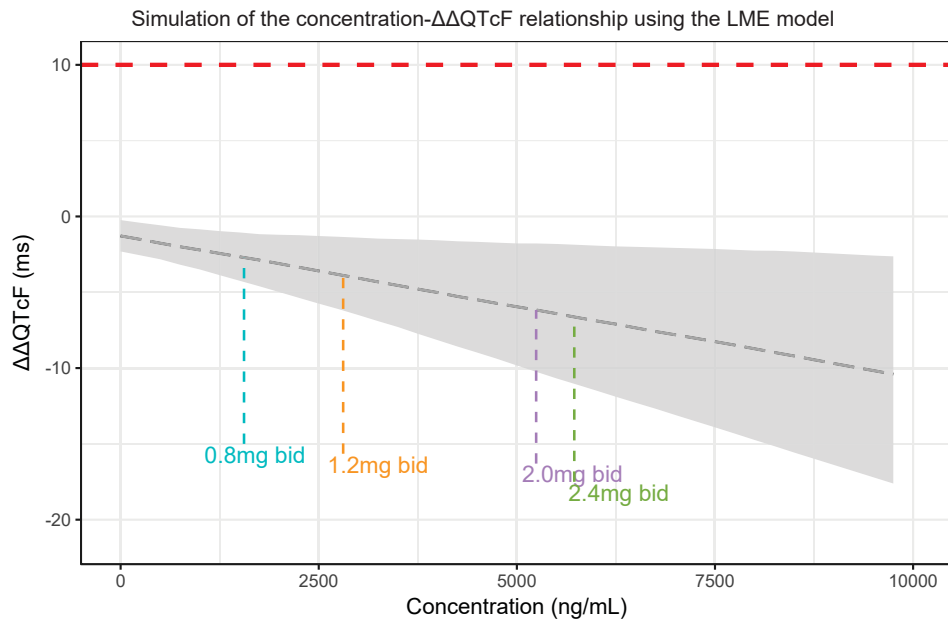

Figure S2: The vertical dashed lines indicate the geometric mean  $C_{max}$  at steady-state observed with twice daily (bid) dosing using the NEXThaler device in the Extension study. The grey area is the 90% confidence interval.
