# Supplementary material for: Concentration–QT Modeling Following Inhalation of the Novel Inhaled Phosphodiesterase‐4 Inhibitor CHF6001 in Healthy Volunteers Shows an Absence of QT Prolongation
Source: PubMed Central journal article supplement — CPT Pharmacometrics Syst Pharmacol. 2019 May 11;8(7):460–8. doi: 10.1002/psp4.12405 (PMC6656937; doi:10.1002/psp4.12405), 2019-05-11
Supplement: PSP4-8-460-s004.pdf [file PSP4-8-460-s004.pdf]

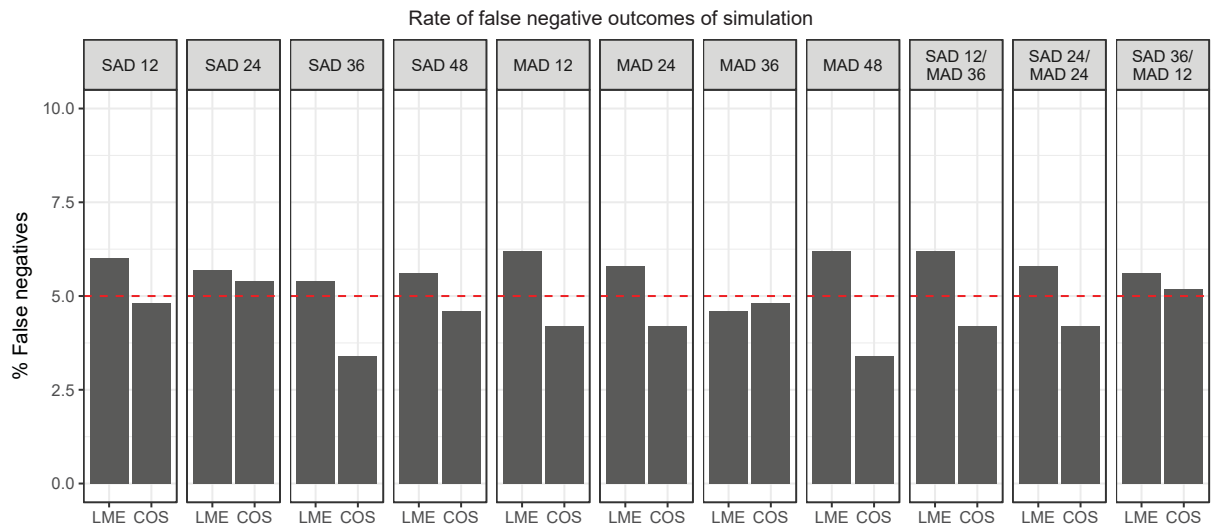

Figure S4: Rate of false negative outcomes, when the data was simulated with the Cosine model (COS) and a true slope of 0.00162 ms/pg/mL, corresponding to an increase in QTcF of 10 ms at the Cmax following twice daily dosing of 2.4 mg. The labels on each panel indicate the design (single ascending dose [SAD] or multiple ascending dosing [MAD]) and the number of subjects.
